# Supplementary material for: Resonant photoacoustic cells for laser-based methane detection
Source: Copernicus journal article supplement (doi:10.5194/jsss-12-37-2023), 2023-01-25
Supplement: Supplementary file 1 [file jsss-12-37-2023-supplement.zip]

Archive with 2 entries (2 files):
- jsss-12-37-2023-supplement-title-page.pdf
- Fig S1.PNG
