# Supplementary material for: Resonant photoacoustic cells for laser-based methane detection
Source: Copernicus journal article supplement (doi:10.5194/jsss-12-37-2023), 2023-01-25
Supplement: Supplementary file 1 [file jsss-12-37-2023-supplement.zip › jsss-12-37-2023-supplement-title-page.pdf]

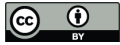

*Supplement of*

## **Resonant photoacoustic cells for laser-based methane detection**

**Katrin Schmitt et al.**

*Correspondence to:* Katrin Schmitt ([katrin.schmitt@ipm.fraunhofer.de](mailto:katrin.schmitt@ipm.fraunhofer.de))

- [jsss-12-37-2023-supplement-title-page.pdf](#)
- [Fig S1.PNG](#)

The copyright of individual parts of the supplement might differ from the article licence.
