# Supplementary figures and images for: Resonant photoacoustic cells for laser-based methane detection
Source: Copernicus journal article supplement (doi:10.5194/jsss-12-37-2023), 2023-01-25

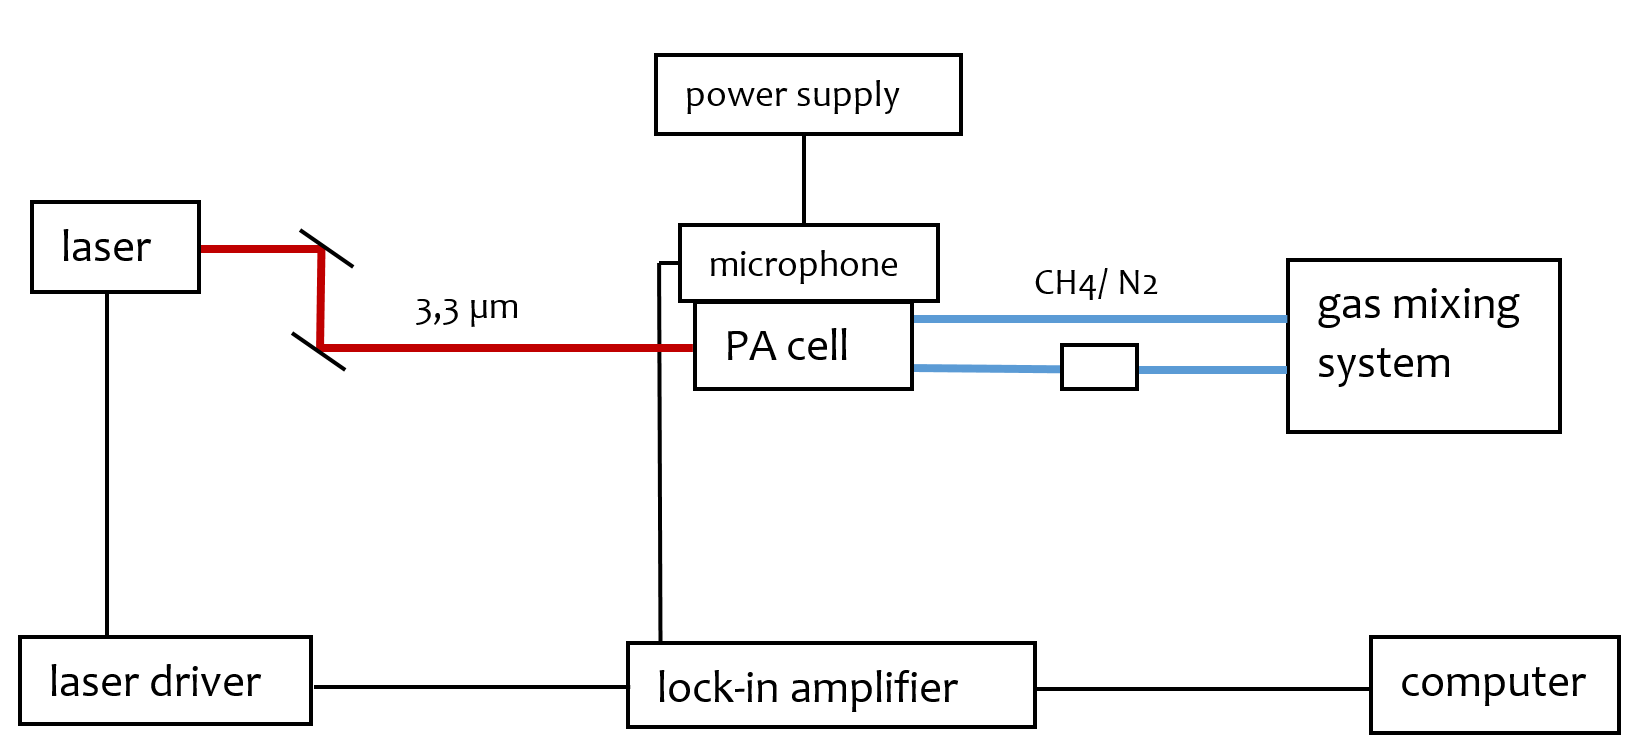

Supplement: Supplementary file 1 [file jsss-12-37-2023-supplement.zip › Fig S1.PNG]
